# Supplementary material
Source: PubMed Central journal article supplement (PMC3716203)
Supplement: supp_blood-2013-03-488171_blood-2013-03-488171-1.pdf [file supp_blood-2013-03-488171_blood-2013-03-488171-1.pdf]

**Supplemental Table 1. Antibodies used for immunohistochemical stains**

| <b>Test antibody</b>   | <b>Source</b>                          | <b>Catalog No/<br/>Clone</b>   | <b>Antigen retrieval</b>                           | <b>Antibody dilution</b> | <b>Incubation time</b> |
|------------------------|----------------------------------------|--------------------------------|----------------------------------------------------|--------------------------|------------------------|
| <b>CD20</b>            | Dako                                   | Code M0755/<br>Clone L26       | Citrate buffer (pH 6.0),<br>pressure cooker 10 min | 1/2000                   | 40 min                 |
| <b>CD10</b>            | Novocastra, Leica<br>Biosystems        | NCL-CD10-270/<br>Clone 56C6    | Citrate buffer (pH 6.0),<br>pressure cooker 10 min | 1/250                    | 40 min                 |
| <b>Ki67</b>            | Dako                                   | Code M7240/<br>Clone MIB-1     | Citrate buffer (pH 6.0),<br>pressure cooker 10 min | 15/20000                 | 40 min                 |
| <b>MUM1/IRF4</b>       | Dako                                   | Code M7259/<br>Clone MUM1p     | Citrate buffer (pH 6.0),<br>pressure cooker 10 min | 1/400                    | 40 min                 |
| <b>Bcl-6</b>           | Novocastra, Leica<br>Biosystems        | NCL-L-Bcl-6-564                | Citrate buffer (pH 6.0),<br>pressure cooker 10 min | 1/500                    | 40 min                 |
| <b>Bcl-2</b>           | Dako                                   | Code M0887/<br>Clone 124       | Citrate buffer (pH 6.0),<br>pressure cooker 10 min | 1/200                    | 40 min                 |
| <b>CD138</b>           | Dako                                   | Code M7228/<br>Clone MI15      | Citrate buffer (pH 6.0),<br>pressure cooker 10 min | 1/200                    | 40 min                 |
| <b>CD5</b>             | Novocastra, Leica<br>Biosystems        | NCL-CD5-4C7/<br>Clone 4C7      | Citrate buffer (pH 6.0),<br>pressure cooker 10 min | 1/500                    | 40 min                 |
| <b>p53</b>             | Dako                                   | Code M7001/<br>Clone D-O7      | Citrate buffer (pH 6.0),<br>pressure cooker 10 min | 1/3000                   | 40 min                 |
| <b>HIV-1 p24</b>       | Dako                                   | Code M0857/<br>Clone Kal-1     | Citrate buffer (pH 6.0),<br>pressure cooker 10 min | 1/20                     | 40 min                 |
| <b>HIV-1 tat</b>       | Abcam                                  | Code ab42359                   | Citrate buffer (pH 6.0),<br>pressure cooker 10 min | 1/1000                   | 40 min                 |
| <b>LMP1</b>            | Dako                                   | Code M0897/<br>Clones CS.1-4   | Citrate buffer (pH 6.0),<br>pressure cooker 10 min | 1/12000                  | 40 min                 |
| <b>LANA1</b>           | Advanced<br>Bioscience<br>Laboratories | Clone Orf-73                   | Citrate buffer (pH 6.0),<br>pressure cooker 10 min | 1/40000                  | 40 min                 |
| <b>CD3</b>             | Lab Vision, Thermo<br>Scientific       | CD-3-SP7                       | Citrate buffer (pH 6.0),<br>pressure cooker 10 min | 1/500                    | 40 min                 |
| <b>CD4</b>             | Novocastra, Leica<br>Biosystems        | NCL-CD4-368                    | Citrate buffer (pH 6.0),<br>pressure cooker 10 min | 1/500                    | 40 min                 |
| <b>CD8</b>             | Dako                                   | Code M7103/<br>Clone C8/144B   | Citrate buffer (pH 6.0),<br>pressure cooker 10 min | 1/400                    | 40 min                 |
| <b>TIA1</b>            | Immunotech,<br>Beckman Coulter         | Code IM2550                    | Citrate buffer (pH 6.0),<br>pressure cooker 10 min | 1/400                    | 40 min                 |
| <b>granzyme B</b>      | Novocastra, Leica<br>Biosystems        | NCL-GRAN-B                     | Citrate buffer (pH 6.0),<br>pressure cooker 10 min | 1/40                     | 40 min                 |
| <b>perforin</b>        | Novocastra, Leica<br>Biosystems        | NCL-PERFORIN                   | Citrate buffer (pH 6.0),<br>pressure cooker 10 min | 1/25                     | 40 min                 |
| <b>FOXP3</b>           | Abcam                                  | Code ab20034/<br>Clone 263A/E7 | Citrate buffer (pH 6.0),<br>pressure cooker 10 min | 1/100                    | 40 min                 |
| <b>CD56</b>            | AbD Serotec                            | MCA591                         | Citrate buffer (pH 6.0),<br>pressure cooker 10 min | 1/1200                   | 40 min                 |
| <b>CD57</b>            | Novocastra, Leica<br>Biosystems        | NCL-NK1                        | Citrate buffer (pH 6.0),<br>pressure cooker 10 min | 1/100                    | 40 min                 |
| <b>PD1/<br/>CD279</b>  | Abcam                                  | Code ab52587/<br>Clone NAT     | Citrate buffer (pH 6.0),<br>pressure cooker 10 min | 1/100                    | 40 min                 |
| <b>PDL1/<br/>CD274</b> | Abcam                                  | Code ab82059-7                 | Citrate buffer (pH 6.0),<br>pressure cooker 10 min | 1/5                      | 40 min                 |
| <b>CD68</b>            | Dako                                   | Code M0814/<br>Clone KP1       | Citrate buffer (pH 6.0),<br>pressure cooker 10 min | 1/8000                   | 40 min                 |
| <b>CD163</b>           | Novocastra, Leica<br>Biosystems        | NCL-L-CD163                    | Citrate buffer (pH 6.0),<br>pressure cooker 10 min | 1/250                    | 40 min                 |
| <b>CD34</b>            | Dako                                   | Code M7165/<br>Clone Qbend10   | Citrate buffer (pH 6.0),<br>pressure cooker 10 min | 1/400                    | 40 min                 |
